# Supplementary material for: Spectral, theoretical characterization and antifungal properties of two phenol derivative Schiff bases with an intramolecular hydrogen bond
Source: Royal Society of Chemistry journal article supplement (doi:10.1039/c5nj01469g), 2015-01-01
Supplement: c5nj01469g1.pdf [file c5nj01469g1.pdf]

**Spectral, theoretical characterization and antifungal properties of two phenol derivatives Schiff base with an intramolecular hydrogen bond**

Alexander Carreño,<sup>a,\*</sup> Manuel Gacitúa,<sup>b,g</sup> Dayán Páez-Hernández,<sup>a,f</sup> Rubén Polanco,<sup>d</sup> Marcelo Preite,<sup>c</sup> Juan A. Fuentes,<sup>d</sup> Guido C. Mora,<sup>e</sup> Ivonne Chávez,<sup>b,f</sup> Ramiro Arratia-Pérez<sup>a,f</sup>

<sup>a</sup>Doctorado en Fisicoquímica Molecular, Center of Applied Nanosciences (CENAP), Universidad Andres Bello, Ave. República 275, Santiago, Chile, Zip Code: 8370146.

<sup>b</sup>Departamento de Química Inorgánica, Facultad de Química, Pontificia Universidad Católica de Chile.

<sup>c</sup>Departamento de Química Orgánica, Facultad de Química, Pontificia Universidad Católica de Chile.

<sup>d</sup>Facultad de Ciencias Biológicas, Laboratorio de Microbiología, Universidad Andres Bello, República 217, Santiago, Chile.

<sup>e</sup>Facultad de Medicina, Laboratorio de Microbiología, Universidad Andres Bello, República 590, Santiago, Chile

<sup>f</sup>Núcleo Milenio de Ingeniería Molecular para Catálisis y Biosensores, ICM, Chile

<sup>g</sup>Current address: Center of Applied Ecology and Sustainability (CAPES), Universidad Adolfo Ibáñez, Peñalolén, Chile

email: [acarreno@uc.cl](mailto:acarreno@uc.cl)

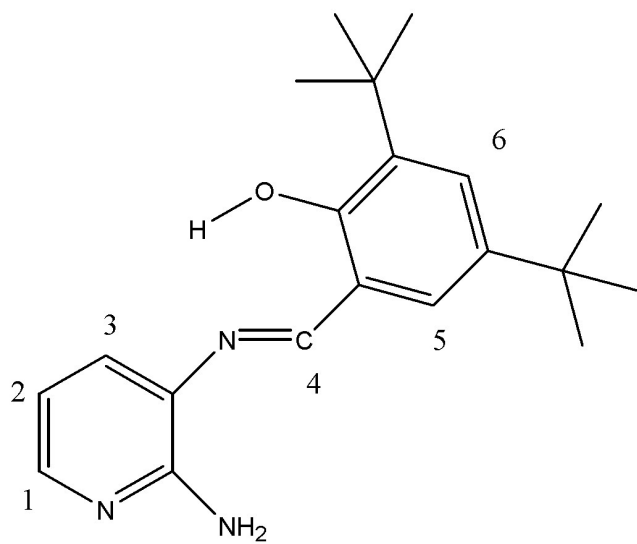

**L1**

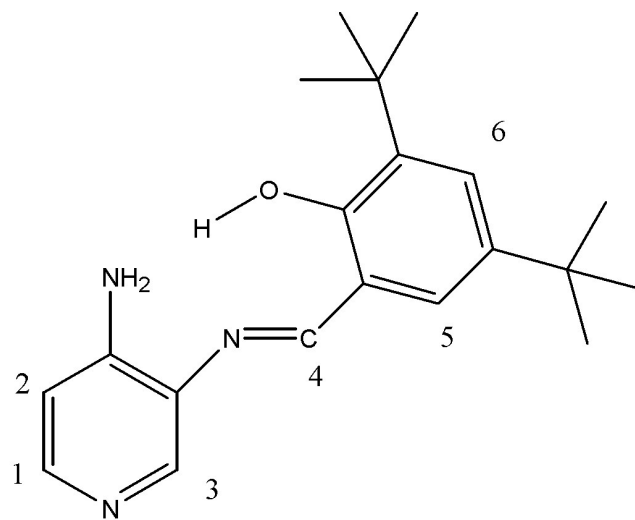

**L2**

**Figure S1.** Numbering used in protons assignments of **L1** and **L2**.

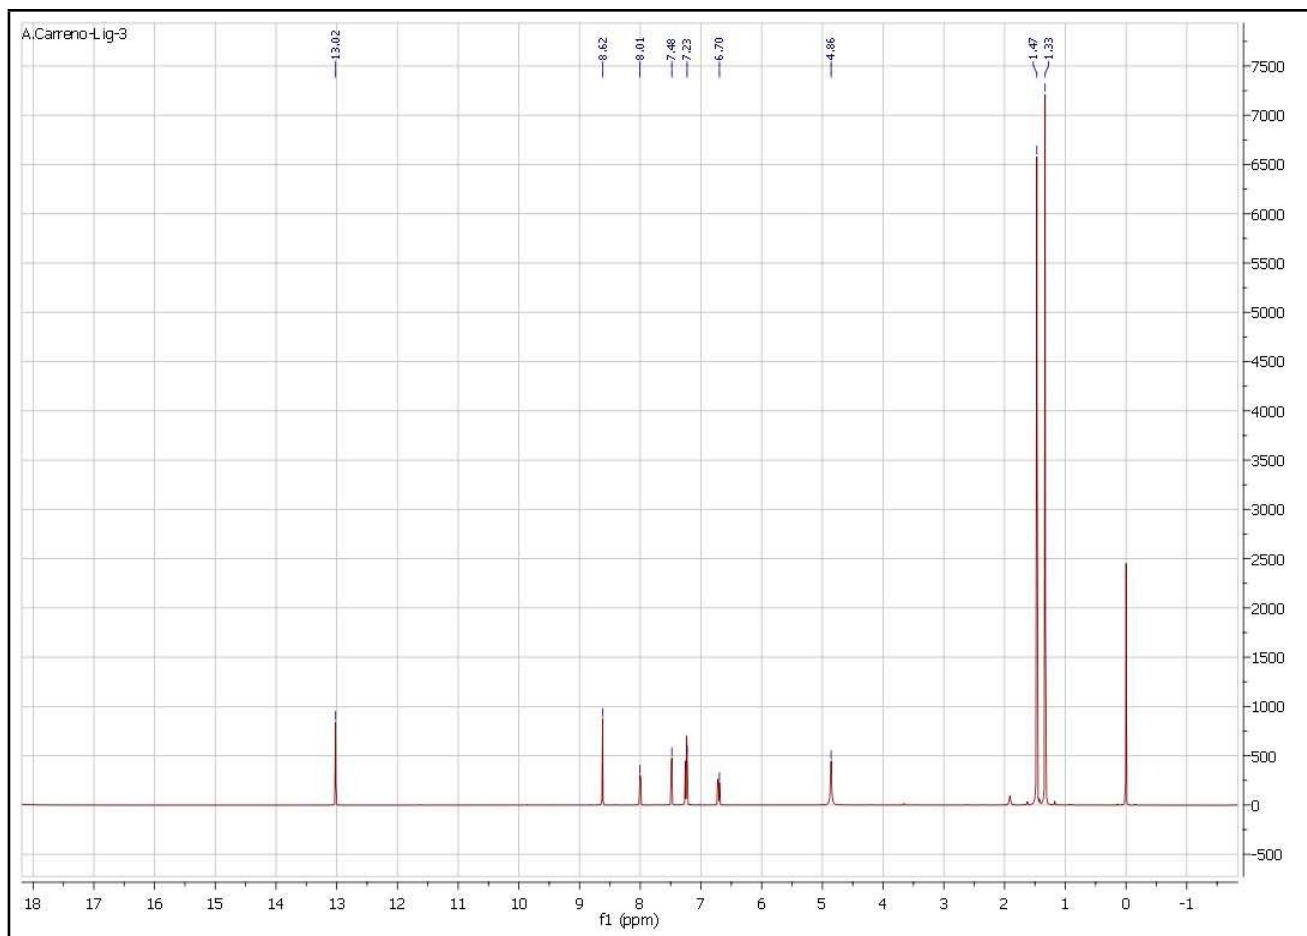

**Figure S2.**  $^1\text{H}$ NMR spectra of **L1** in  $\text{CDCl}_3$ .

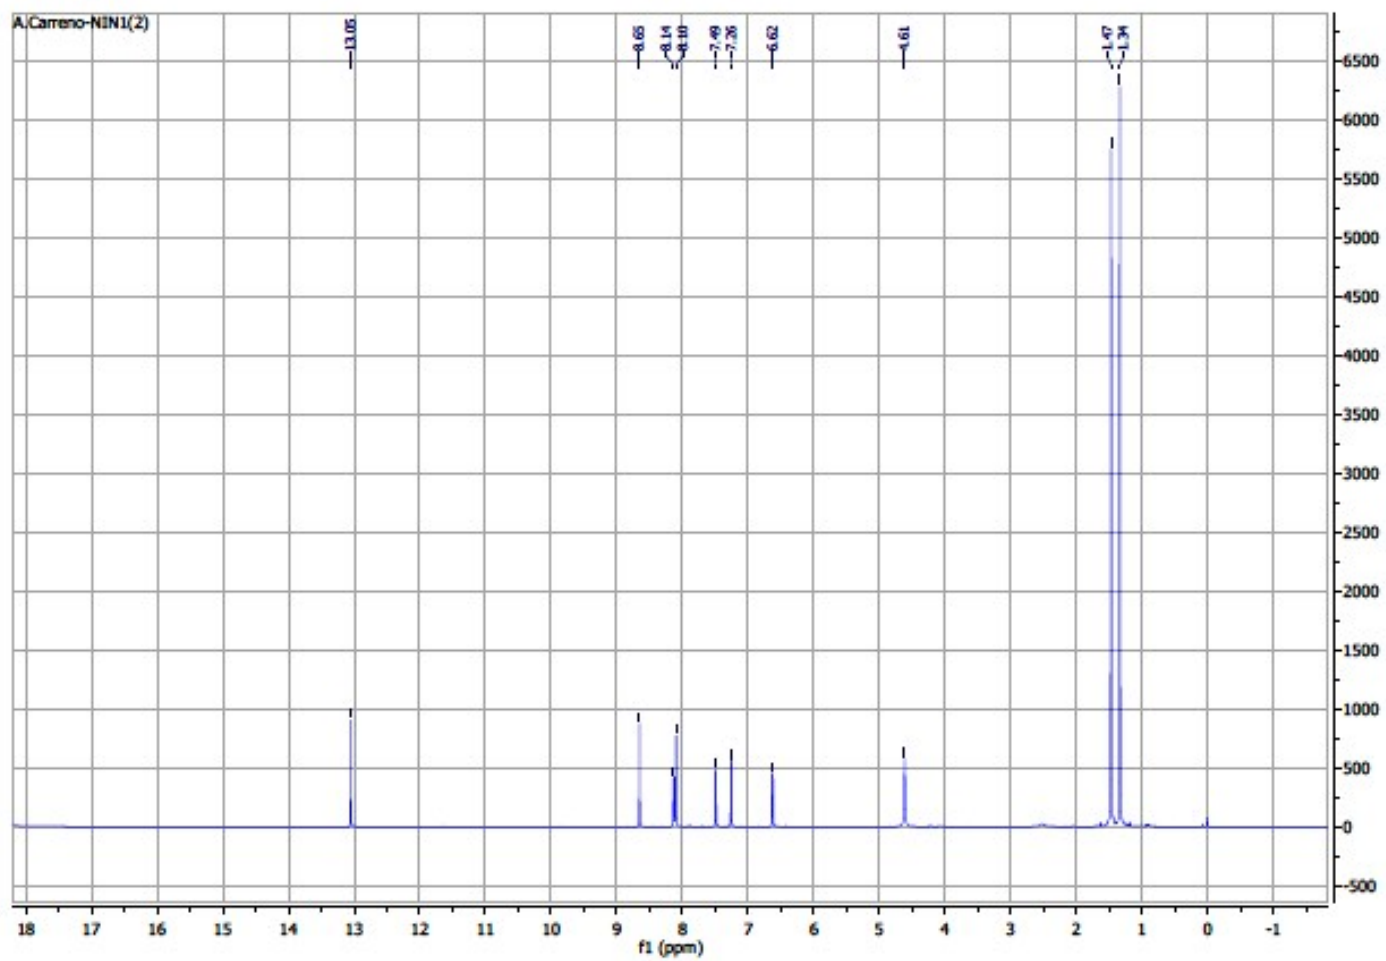

**Figure S3.** <sup>1</sup>H NMR spectra of **L2** in CDCl<sub>3</sub>.

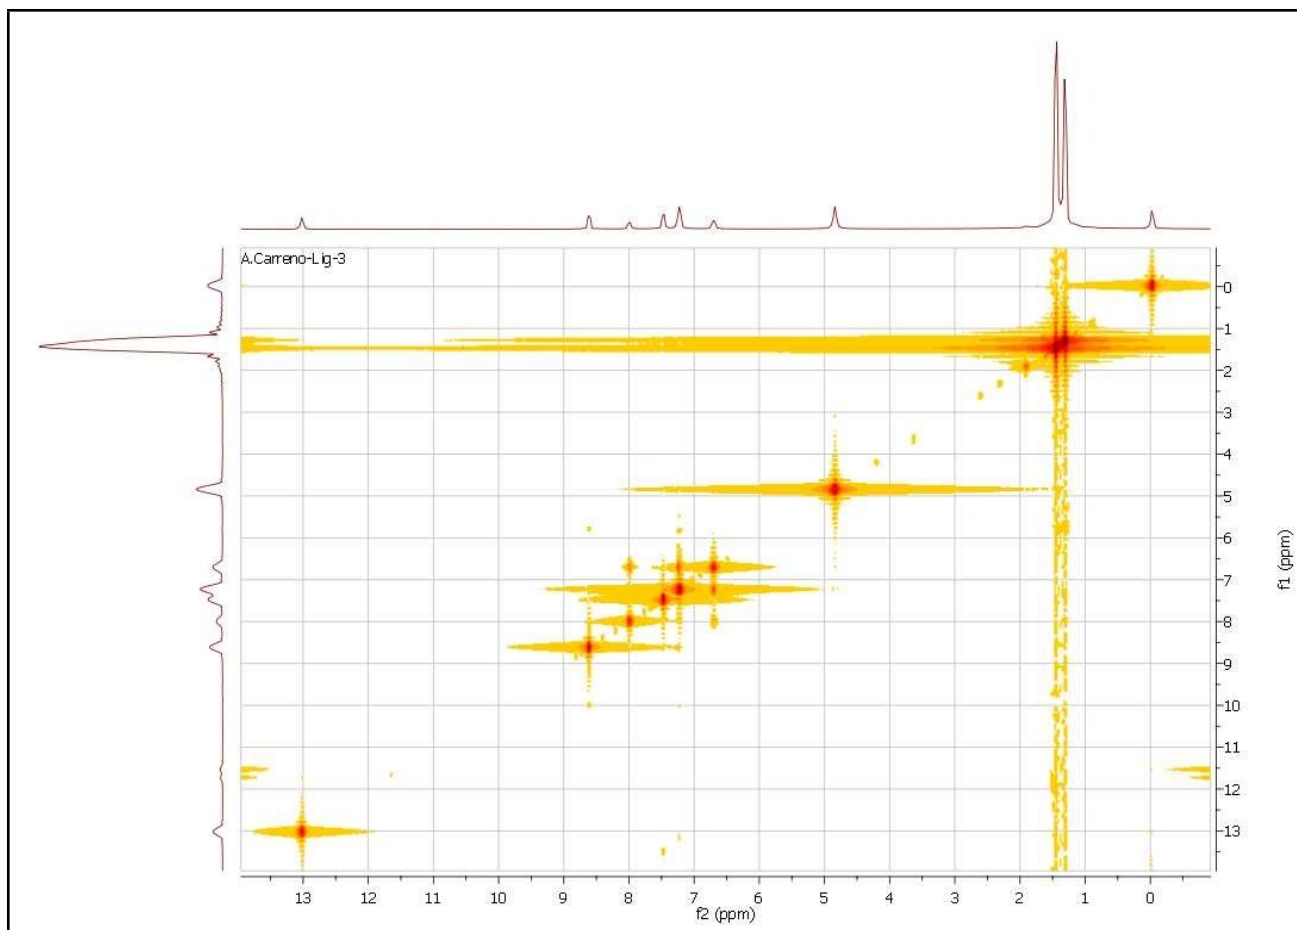

**Figure S4.** HHCOSY of L1 in CDCl<sub>3</sub>.

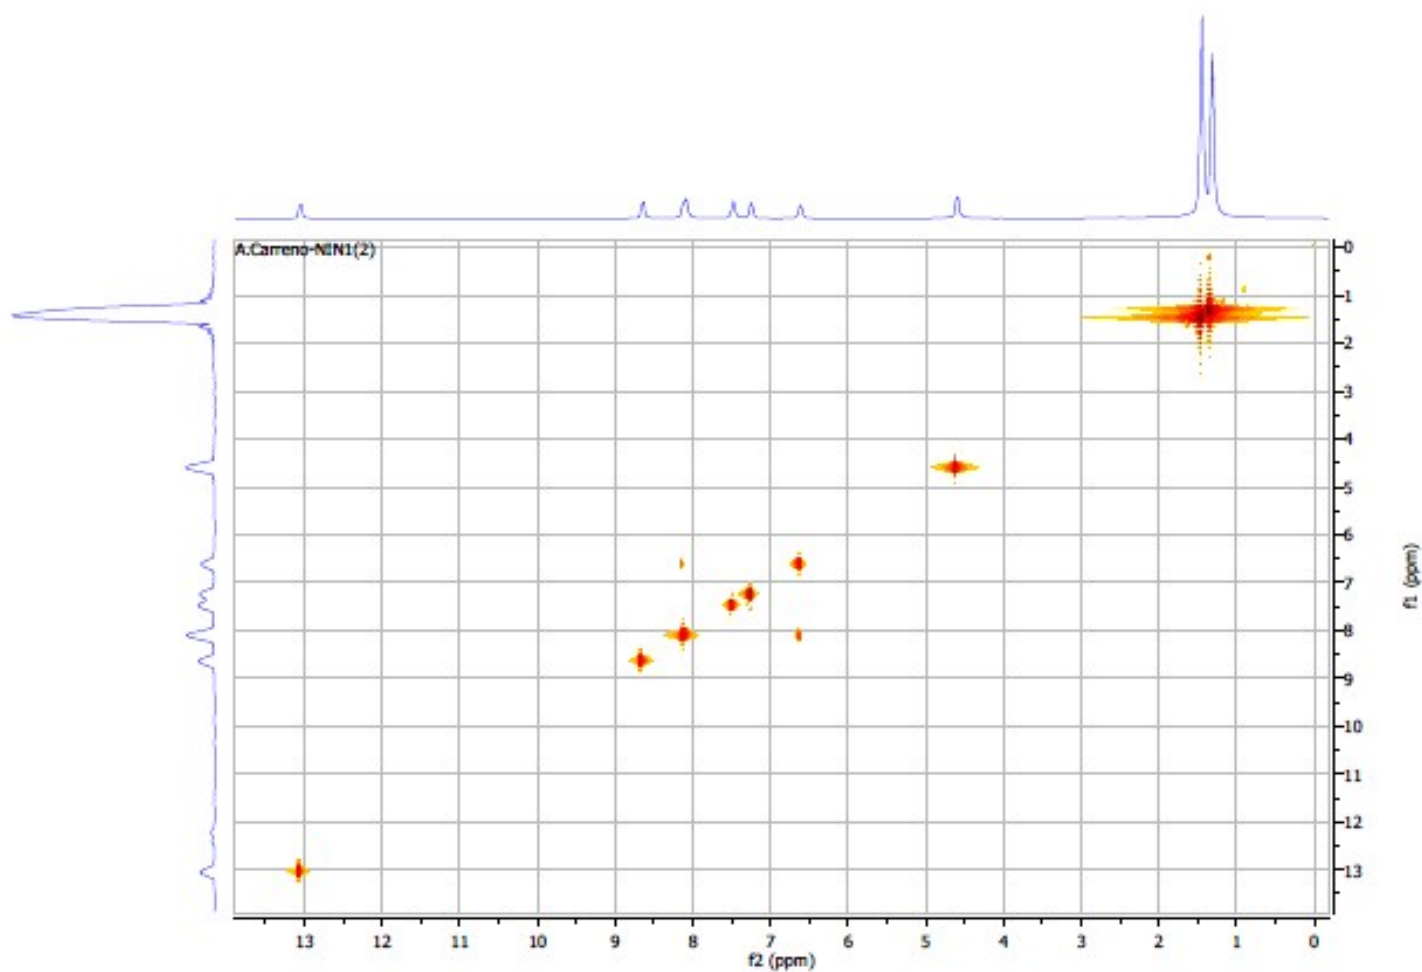

**Figure S5.** HHCOSY spectra of **L2** in CDCl<sub>3</sub>.

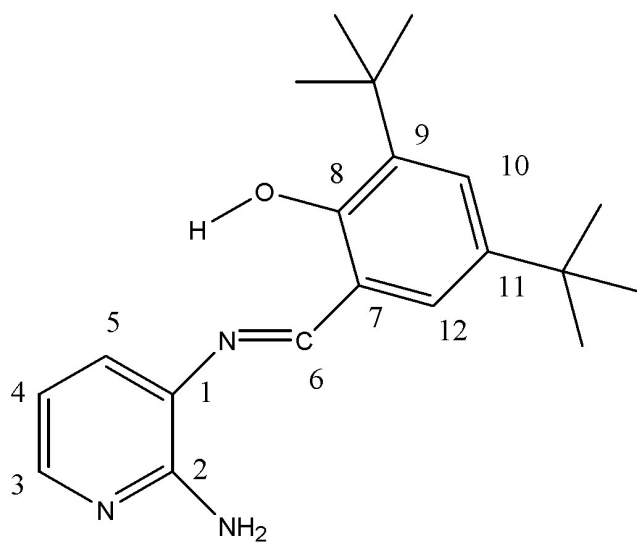

**L1**

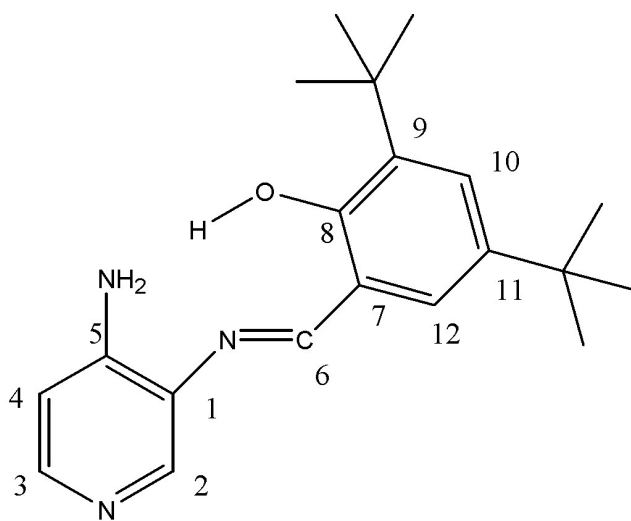

**L2**

**Figure S6.** Numbering used in carbon assignments for **L1** and **L2**.

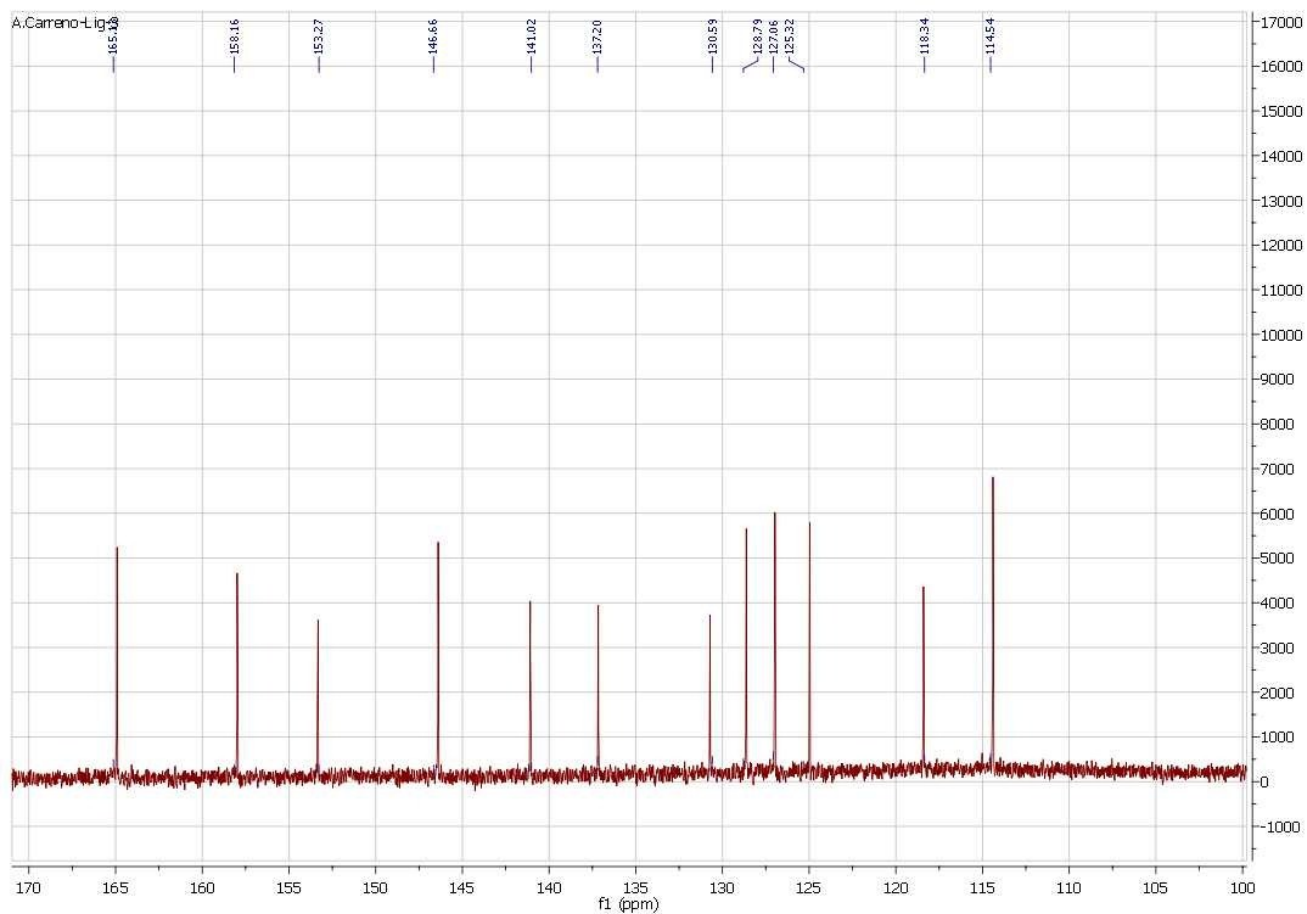

**Figure S7.** <sup>13</sup>CNMR spectra of L1 in CDCl<sub>3</sub>.





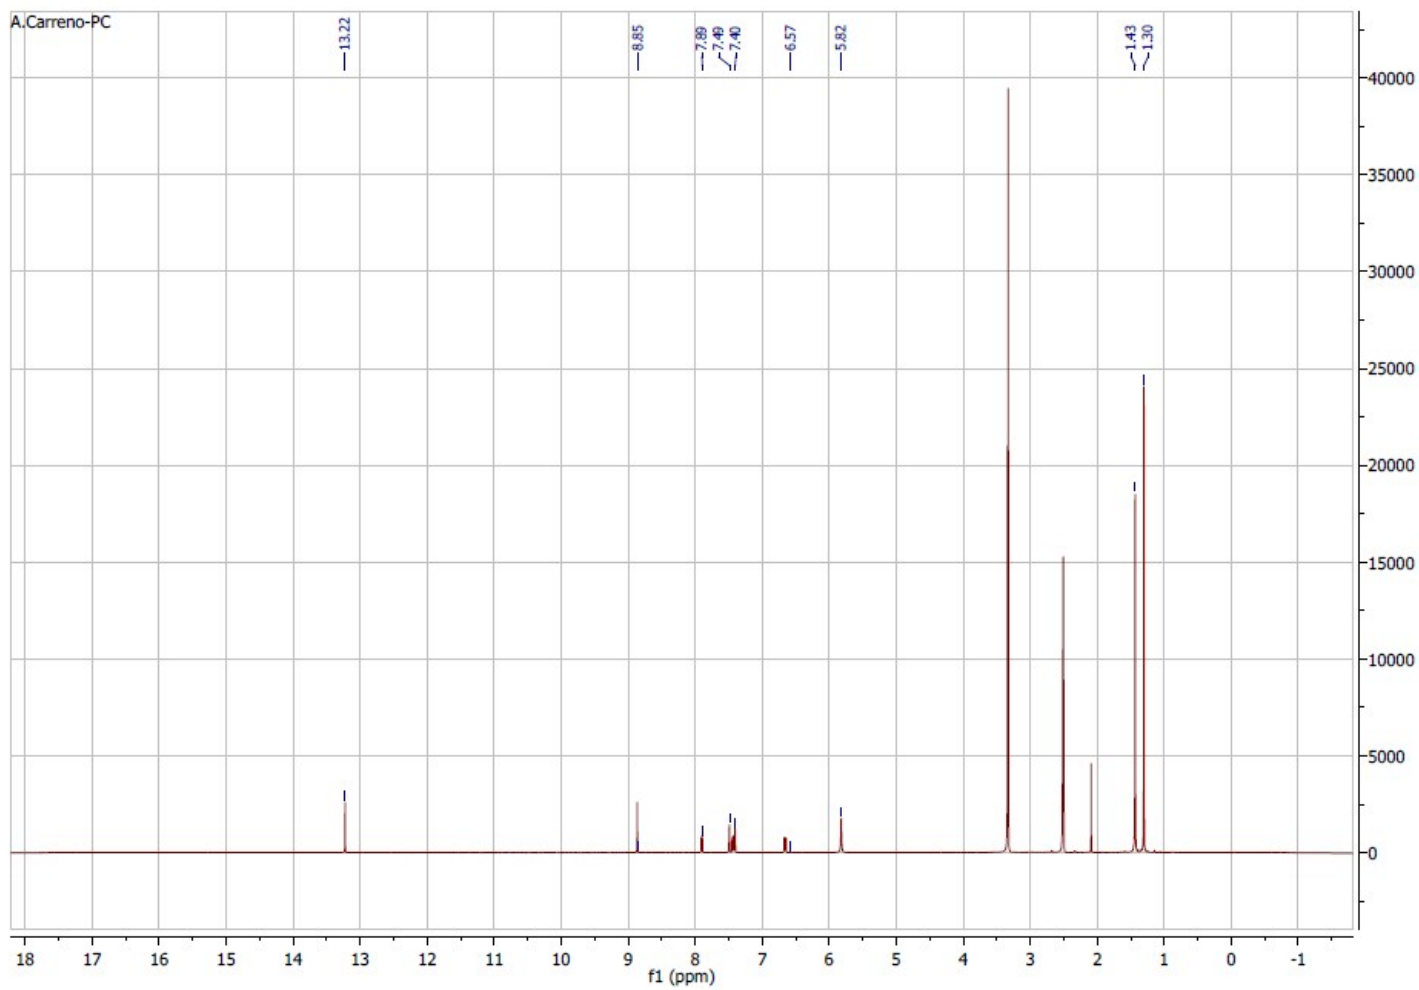

*Figure S9.*  $^1\text{H}$ NMR of **L1** in  $\text{DMSO-d}_6$ .

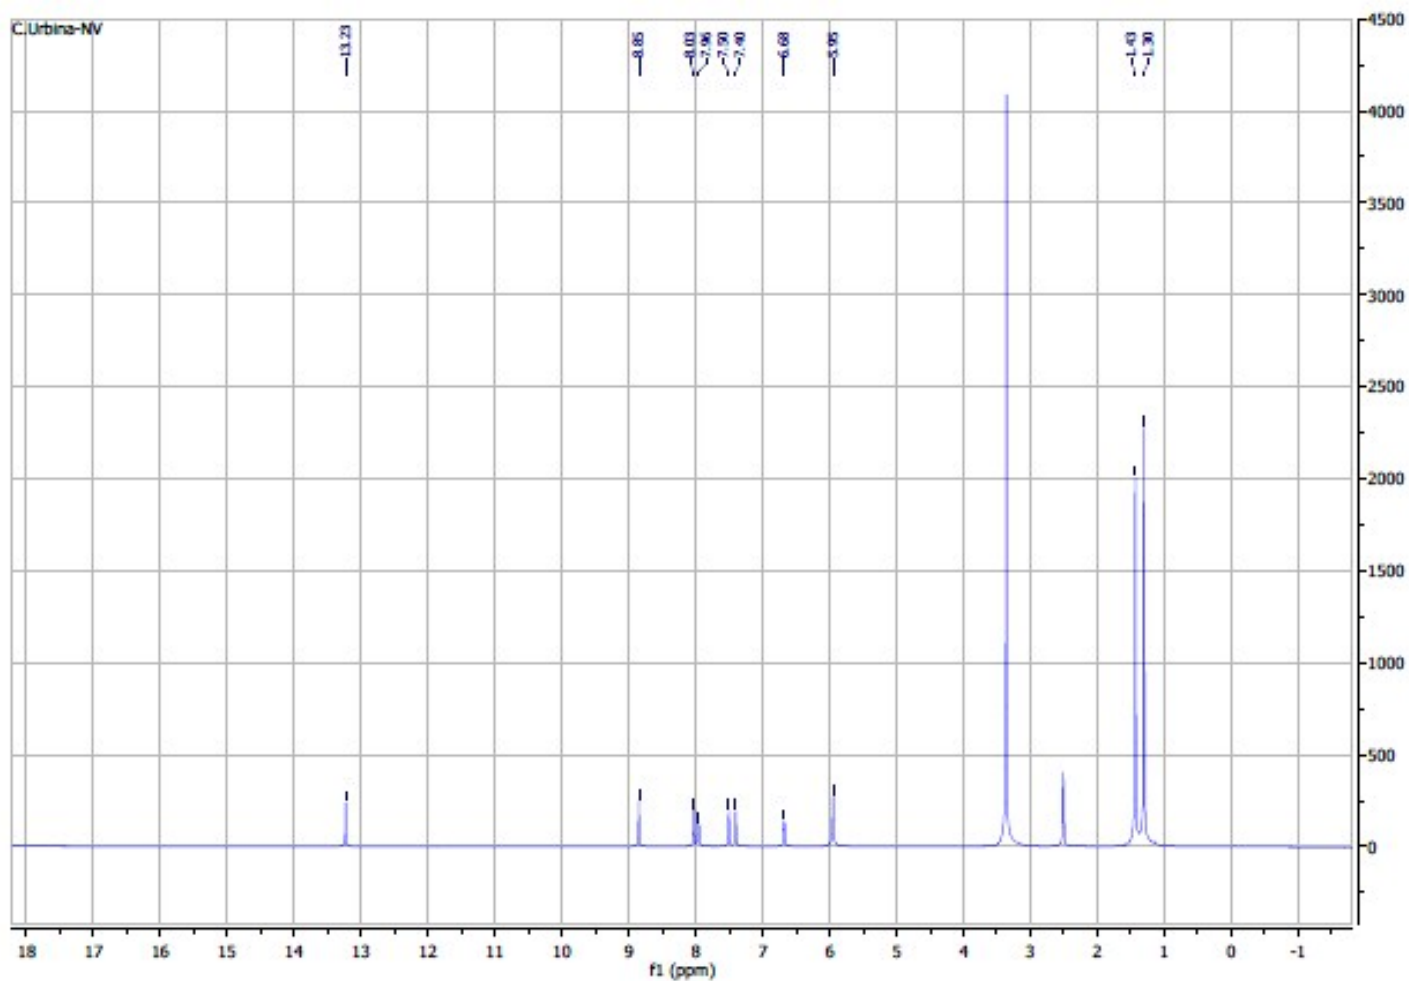

*Figure S10.* <sup>1</sup>H NMR of L2 in DMSO-d<sub>6</sub>.

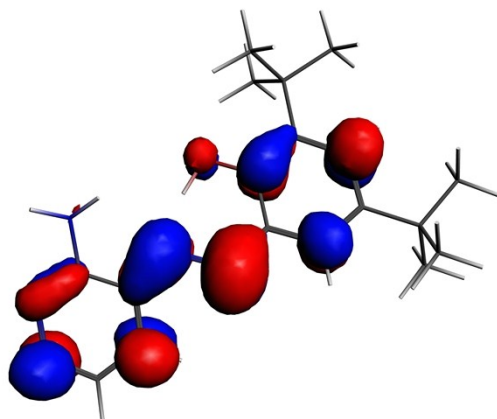

**Figure S11.** SOMO of the reduced form of **L1**.

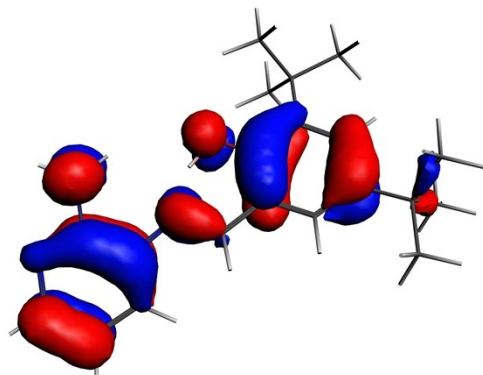

**Figure S12.** SOMO of the oxidized form of **L1**.

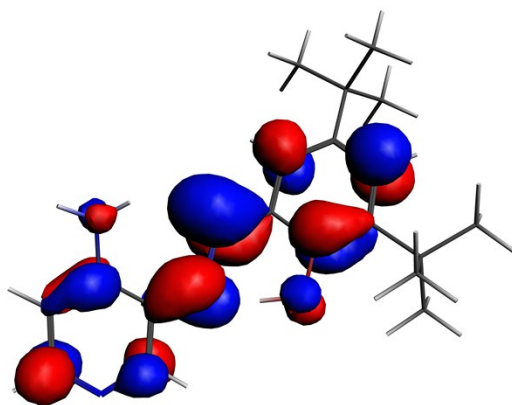

**Figure S13.** SOMO of the reduced form of **L2**.

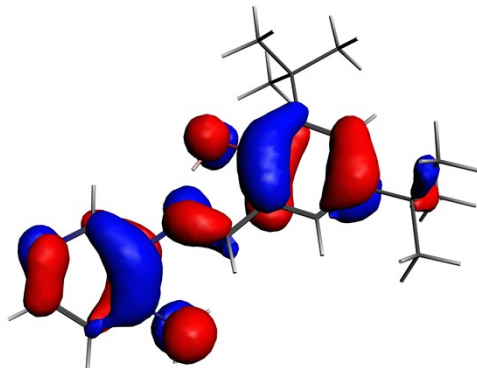

**Figure S14.** SOMO of the oxidized form of **L2**.
